# Supplementary material for: Multishell Diffusion MR Tractography Yields Morphological and Microstructural Information of the Anterior Optic Pathway: A Proof-of-Concept Study in Patients with Leber’s Hereditary Optic Neuropathy
Source: MDPI journal article supplement (doi:10.3390/ijerph19116914), 2022-06-05
Supplement: s1 [file s1]

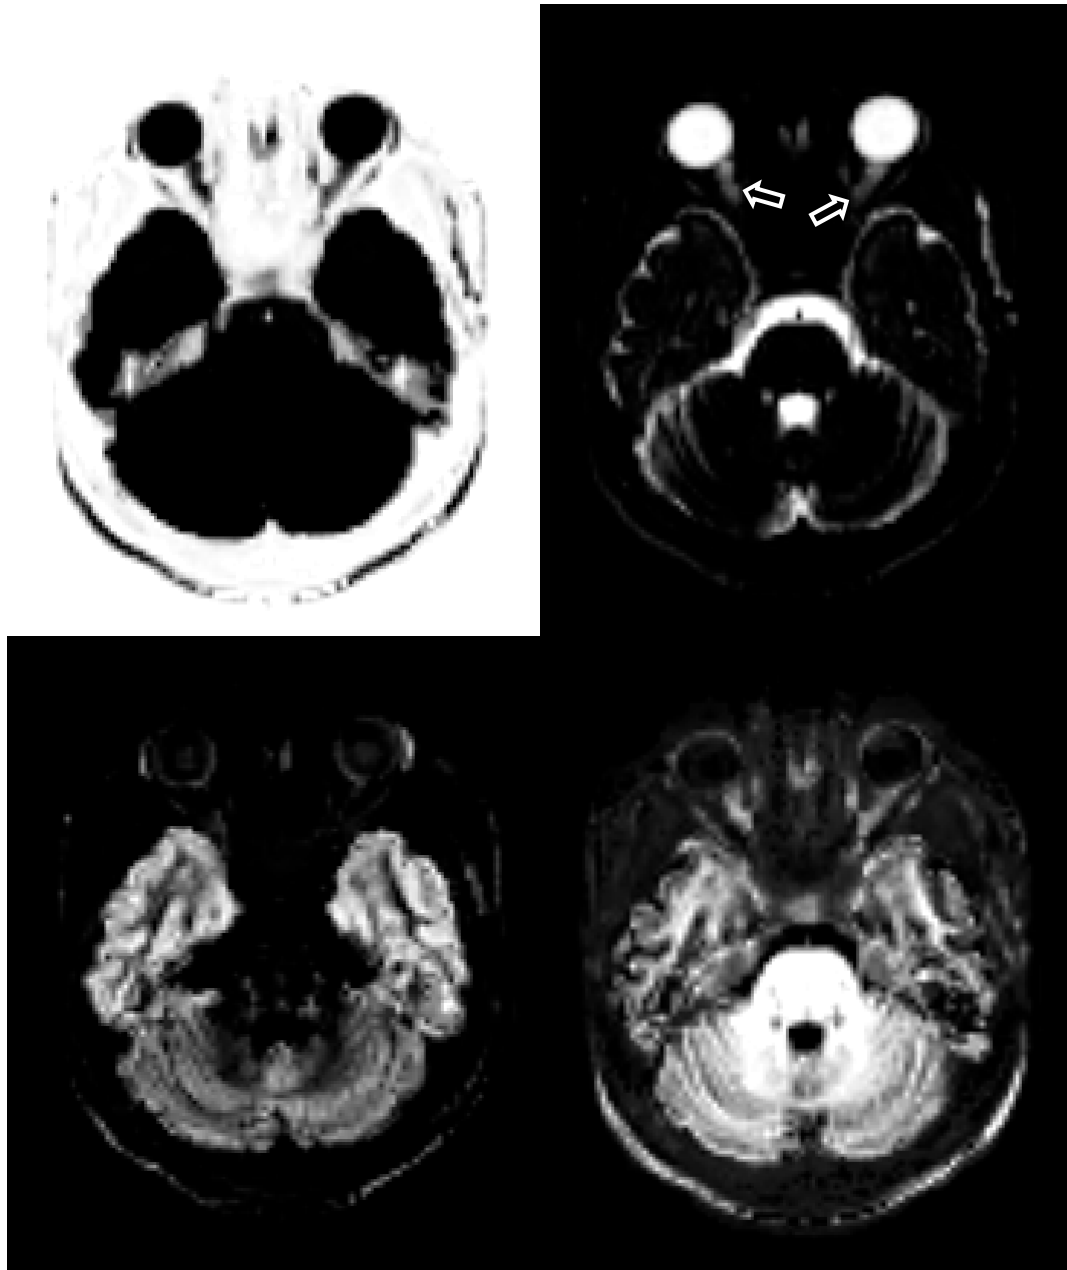

**Figure S1.** Signal fractions assigned to 3 tissue compartments by multi-tissue spherical deconvolution algorithm (msmt\_csd) supplemented by background signal fraction, in one axial slice of a representative healthy control subject. (A) background; (B) CSF-like (normalized CSF, nCSF); (C) grey matter-like (nGM); (D) white matter-like (nWM). Note the variable fraction assigned to nGM and nCSF along the nerve, indicated by a small white arrow, and the absence of signal in the background component. For the purposes of visualization, the images have been interpolated to 1 mm resolution using a bicubic spline. The grey scale runs from 0% (black) to 90% (white).
